# Supplementary material for: Response mechanism of water status and photosynthetic characteristics of Cotoneaster multiflorus under drought stress and rehydrated conditions
Source: Frontiers journal article supplement (doi:10.3389/fpls.2024.1457955), 2025-01-14
Supplement: Table_1.xls [file Table_1.xls]

## Sheet: Supplementary Table 1
Supplementary Table 1 Results of principal component analysis of the C. multiflorus indicators
Indiccators	Factor 1	Factor 2	Factor 3	Factor 4	Factor 5	Factor 6	Factor 7	Factor 8	Factor 9	Factor 10	Factor 11	Factor 12	Factor 13	Factor 14	Factor 15	Factor 16	Factor 17	Factor 18	Factor 19	Factor 20	Factor 21	Factor 22	Factor 23	Factor 24	Factor 25
Leaf water potential	-0.2074	-0.145	-0.1671	0.0879	0.2105	-0.1439	0.2121	-0.0663	0.0514	-0.0682	0.445	-0.0476	-0.0522	-0.005	-0.2828	-0.3477	-0.1302	-0.029	0.4081	-0.3498	0.0259	0.0517	-0.0687	-0.0021	-0.2449
RWC	0.2148	-0.0322	0.0237	-0.0568	-0.1394	0.0898	0.4143	0.1164	-0.0466	0.0917	0.1128	0.0248	0.0774	0.0569	-0.0619	-0.023	0.732	0.0024	-0.0971	-0.357	-0.0376	-0.0388	0.0678	-0.0214	0.1345
Stomatal opening length	0.2051	-0.1134	0.0034	0.4325	-0.4254	0.0198	0.2545	0.1926	-0.0227	0.1616	-0.3185	0.0057	0.1005	0.0465	0.2225	-0.3925	-0.2502	-0.0495	0.2407	-0.0025	-0.0537	-0.006	0.0407	-0.0563	0.0115
Stomatal opening width	0.212	0.0587	0.1358	-0.181	-0.0295	0.1174	0.34	0.085	-0.0552	0.0745	0.2106	0.0418	0.0587	0.0389	-0.1097	0.2315	-0.615	0.0255	-0.3162	-0.3413	-0.0274	-0.0542	0.0745	-0.0014	0.1816
Stomatal openness	0.2139	-0.0594	0.036	0.0821	-0.1685	0.0675	-0.7759	0.146	-0.0427	0.1218	0.1893	0.0189	0.0849	0.0465	-0.0841	-0.1265	0.0062	-0.0142	-0.0012	-0.4283	-0.0431	-0.0331	0.0633	-0.0337	0.0971
Stomatal density	0.1745	-0.0513	0.6887	-0.4156	-0.1309	-0.0719	-0.0072	-0.0396	-0.0023	-0.0569	0.0832	0.1036	-0.0966	0.2512	-0.0583	-0.1416	0.0049	0.0028	0.3719	0.1851	0.0631	-0.0284	-0.0177	0.0369	-0.0141
All-day sap flow	0.2096	-0.1091	-0.1752	0.1024	-0.0504	0.1019	0.0121	0.1858	-0.0553	0.1522	0.5114	-0.0045	0.1328	0.0162	-0.2893	-0.1136	0.0113	-0.0092	-0.1073	0.6447	-0.0694	-0.0358	0.0877	-0.0447	0.0995
Daytime sap flow	0.2034	-0.1886	-0.163	0.0826	0.1081	0.0834	-0.0003	0.1615	-0.0351	0.1133	-0.0656	0.0766	0.102	0.1033	-0.0437	0.6718	-0.0001	0.0866	0.565	-0.0087	-0.0511	-0.0182	0.0591	0.0515	-0.1024
Nocturnal sap flow	-0.078	0.5892	0.0186	0.0734	-0.0185	0.1678	0.0159	-0.0938	-0.019	-0.0073	0.1698	-0.0779	-0.016	-0.3167	0.0866	0.014	0.0037	-0.0486	0.4128	0.0117	-0.0021	-0.0282	0.0206	-0.0636	0.5307
The rabio of nocturnal water refilling	0.1556	-0.4259	-0.1087	-0.2322	0.1332	0.0256	-0.0005	-0.0585	0.0313	-0.0285	0.298	-0.115	-0.0183	-0.1881	0.7328	-0.0461	-0.0195	-0.0501	0.0423	0.0017	0.0239	0.0368	-0.0368	-0.041	0.1364
Nocturnal transpiration	-0.1556	0.4259	0.1087	0.2322	0.0384	-0.0688	0.0086	0.1572	-0.0596	0.0774	0.3598	0.1948	0.0584	0.3846	0.4612	0.0703	0.0371	0.0939	-0.0768	0.0011	-0.0477	-0.0623	0.0758	0.0735	-0.3441
Pn	0.2113	-0.0592	0.0687	0.2763	-0.0738	0.0269	0.0052	-0.8866	-0.0429	0.1603	0.0931	0.0843	0.1016	0.0662	-0.0113	0.082	0.0152	0.0078	-0.0409	-0.0013	-0.0545	-0.0306	0.0645	-0.0083	-0.0593
GS	0.2071	0.1288	-0.1718	-0.2143	0.5314	0.3007	-0.013	-0.0452	-0.1096	0.1269	-0.2525	0.2103	0.1648	0.1262	0.0196	-0.3943	-0.0316	0.274	0.0626	0.0012	-0.0888	-0.0941	0.1589	0.1802	0.0225
Tr	0.2136	-0.0228	-0.012	0.208	-0.0112	0.1244	-0.0012	-0.0014	-0.055	-0.9192	0.038	0.0836	0.1184	0.0802	-0.0022	-0.0011	-0.0019	0.0571	-0.0145	-0.001	-0.0639	-0.0404	0.0829	0.022	0.0393
WUE	0.1954	-0.0354	0.4796	0.3373	0.4344	-0.1365	0.0152	0.1619	-0.0402	0.0579	-0.0141	0.1043	0.0577	-0.5533	-0.0253	0.0168	0.05	-0.0907	-0.0836	-0.0026	-0.0321	-0.0409	0.0488	-0.0681	-0.1705
ABS/RC	0.214	0.003	-0.0829	0.1514	0.0408	0.1081	0.0023	0.0183	-0.0648	0.0159	0.0204	0.0904	-0.9349	0.0396	-0.0063	-0.005	0.0052	0.0602	-0.0294	0.0007	-0.0723	-0.0484	0.098	0.0182	0.0056
TRo/RC	0.2108	0.0876	-0.186	-0.0504	0.0571	-0.8701	-0.0028	-0.0079	-0.0966	-0.0199	-0.0419	0.0773	0.0098	0.0658	0.0022	-0.0099	-0.0108	0.115	0.0113	0.0037	-0.0902	-0.0781	0.1431	0.0419	0.28
ETo/RC	0.2133	0.0788	-0.0417	0.067	0.0542	-0.0196	0.0009	0.0183	-0.0898	0.0136	0.0165	0.1089	0.0024	0.0541	-0.0057	-0.0041	0.0044	0.0834	-0.0289	0.0009	-0.084	-0.0745	-0.9439	0.0286	0.0543
DIo/RC	-0.2095	-0.1378	-0.0871	-0.0276	-0.0585	0.0179	0.0003	0.0043	0.108	0.0028	0.013	0.8894	0.0026	-0.0628	0.0023	0.0017	-0.0059	-0.2254	0.0024	-0.0012	0.0879	0.0968	-0.0006	-0.1312	0.1819
MO	-0.2051	-0.1711	0.1453	0.1364	-0.0751	0.0057	0.0048	0.0154	0.1268	0.0231	0.0576	0.0562	-0.006	-0.0865	-0.0051	0.0116	0.0101	0.8768	-0.0221	-0.0028	0.1056	0.1097	-0.007	-0.185	0.1593
φPo	0.2119	0.1087	-0.0213	0.0323	0.0606	-0.0187	-0.0001	0.0123	0.9552	0.0076	0.0048	-0.0201	0.0024	0.0624	-0.0042	-0.0047	0.003	-0.0227	-0.0207	0.0011	-0.0901	-0.087	-0.0095	0.0628	0.0017
φEo	0.2128	0.0769	-0.0817	0.0992	0.0574	-0.0186	0.0004	0.0119	0.009	0.0074	0.0039	-0.0188	0.0025	0.0589	-0.0045	-0.0059	0.0027	-0.0211	-0.0204	0.0013	0.9564	-0.0733	-0.0092	0.0579	-0.0015
ψo	0.2104	0.1326	0.0059	0.0216	0.0655	-0.0197	-0.0005	0.0131	0.0097	0.0082	0.0056	-0.0216	0.0025	0.0672	-0.0044	-0.0042	0.0033	-0.0245	-0.0218	0.0011	-0.0001	0.9601	-0.0101	0.0681	0.0022
Vi	-0.1986	-0.2014	0.189	0.2866	0.4121	0.023	0.0041	0.0304	0.0109	0.0416	-0.0685	-0.1746	-0.0092	0.5176	-0.0059	0.0166	0.0117	-0.2072	-0.0383	-0.0056	0	0.0086	-0.019	-0.2882	0.4444
Vj	-0.2022	-0.1951	0.1306	0.1926	-0.0217	0.0084	0.0054	0.0235	0.0062	0.0325	0.055	0.0114	-0.0073	-0.0204	-0.0066	0.0154	0.0125	-0.009	-0.0326	-0.0037	-0.0001	0.0037	-0.0122	0.8894	0.2611
